# Supplementary material for: The role of pH in corrosion inhibition of tin using the proline amino acid: theoretical and experimental investigations
Source: Royal Society of Chemistry journal article supplement (doi:10.1039/d0ra04333h), 2020-01-01
Supplement: d0ra04333h1.pdf [file d0ra04333h1.pdf]

## Supplementary Data

# The Role of pH on the corrosion inhibition of tin using proline amino acid: Theoretical and experimental investigations

Brahim EL IBRAHIMI\*<sup>a</sup>, Lahcen BAZZI<sup>b</sup>, Souad EL ISSAMI<sup>a</sup>

<sup>a</sup> Applied Chemistry-Physic Team, Faculty of Sciences, University of Ibn Zohr, P.O. Box 8106, Cité Dakhla, Agadir, Morocco.

<sup>b</sup> Industrial & Logistic Laboratory, Higher School of Management, Telecommunications and Computer Science, SUP MTI, Rabat, Morocco.

**\*Corresponding author**

E-mail address: brahimhm@gmail.com - Phone number: +212672254020

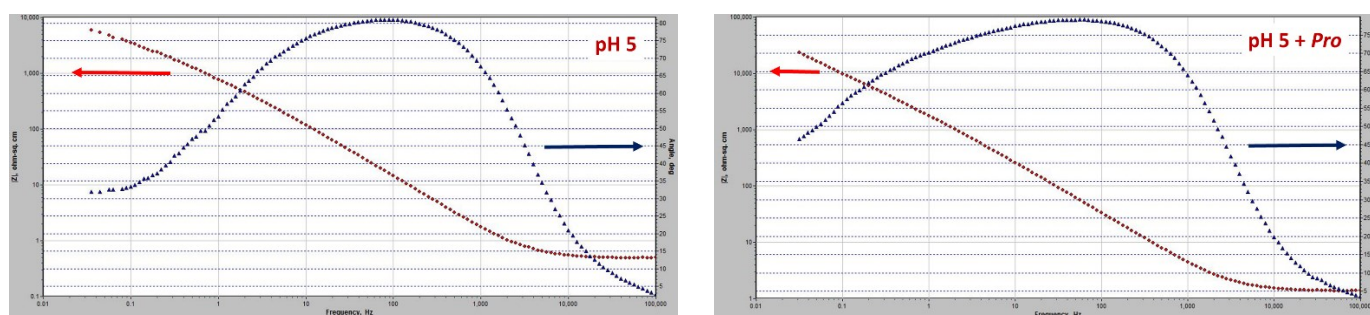

**Fig. S1.** Bode diagrams of tin immersed in 2% NaCl solution at pH 5 without and with *Pro*.

**Table S1.** EIS-derived parameters of tin in 2% NaCl solution at pH 2 without and with *Pro*

| Medium            | $R_s$<br>(ohm cm <sup>2</sup> ) | $Q$<br>( $\mu\text{S s}^n \text{cm}^{-2}$ ) | $n$    | $W$<br>( $\mu\text{S s}^5 \text{cm}^{-2}$ ) $10^{-6}$ |
|-------------------|---------------------------------|---------------------------------------------|--------|-------------------------------------------------------|
| pH 2              | 0.355                           | 0.733                                       | 0.4452 | 0.957                                                 |
| pH 2 + <i>Pro</i> | 0.427                           | 0.837                                       | 0.4107 | 5.744                                                 |
